# Supplementary material for: The Munduruku marmoset: a new monkey species from southern Amazonia
Source: PeerJ journal article supplement (doi:10.7717/peerj.7019), 2019-07-25
Supplement: Supplemental_Table_S1.pdf [file Supplemental_Table_S1.pdf]

Table S1. Framework adopted in this study for taxonomic assessment and decision making, based on Schlick-Steiner *et al.* (2010).

| <b>Sources of information</b>       | <b>Criteria</b>            | <b>Single<br/>source</b> | <b>Integrated<br/>sources</b> |
|-------------------------------------|----------------------------|--------------------------|-------------------------------|
| <b>Pelage pigmentation data</b>     | Phenotypic<br>distinctness | H0 – H1                  |                               |
| Pelage pigmentation pattern         |                            |                          |                               |
| <b>Phylogenomic data</b>            | Monophyly                  | H0 – H1                  | H0 – H1                       |
| Genome-wide sampling of nuclear DNA |                            |                          |                               |
| <b>Distribution data</b>            | Allopatry/<br>Parapatry    | H0 – H1                  |                               |
| Localities of occurrence            |                            |                          |                               |
