# Supplementary material for: The Munduruku marmoset: a new monkey species from southern Amazonia
Source: PeerJ journal article supplement (doi:10.7717/peerj.7019), 2019-07-25
Supplement: Supplemental_Table_S2.pdf [file Supplemental_Table_S2.pdf]

| Taxon                              | Specimen code                                                                                                                                                                                                                                                                                                                                                                                                                                                                                                                                                                                                                                                                                                                                                                                                                                                                                                                                                                                                                                                                                                                                            |
|------------------------------------|----------------------------------------------------------------------------------------------------------------------------------------------------------------------------------------------------------------------------------------------------------------------------------------------------------------------------------------------------------------------------------------------------------------------------------------------------------------------------------------------------------------------------------------------------------------------------------------------------------------------------------------------------------------------------------------------------------------------------------------------------------------------------------------------------------------------------------------------------------------------------------------------------------------------------------------------------------------------------------------------------------------------------------------------------------------------------------------------------------------------------------------------------------|
| <i>Mico acariensis</i><br>(n=6)    | INPA: <b>3931</b> ; MPEG: 45578 <sup>*</sup> , 45579 <sup>*</sup> , 45580 <sup>*</sup> ,<br>45581 <sup>*</sup> , 45582 <sup>*</sup> .                                                                                                                                                                                                                                                                                                                                                                                                                                                                                                                                                                                                                                                                                                                                                                                                                                                                                                                                                                                                                    |
| <i>Mico argentatus</i><br>(n=151)  | FMNH: 19499, 19533, 50839, 50840, 50841,<br>92177, 92178, 92179, 92180; INPA: 2473; MPEG:<br>29, 38, 151, 154, 156, 157, 162, 163, 164, 165, 165,<br>166, 269, 328, 336, 6878, 8951, 8952, 8982, 8983,<br>8984, 8985, 8986, 8987, 9200, 9201, 9202, 9203,<br>9204, 9205, 9206, 9207, 9208, 9212, 10021, 10022,<br>10023, 10024, 10025, 10026, 21373, 21374, 21375,<br>21376, 21377, 21378, 21379, 21380, 21381, 21382,<br>21383, 21384, 21385, 21386, 21387, 21388, 21389,<br>21390, 21391, 21392, 21393, 21394, 21414, 21630,<br>21631, 21632, 21633, 21634, 21635, 21636, 21637,<br>22922, 22923, 22924, 22925, 22926, 22927, 22928,<br>22929, 23156, 23157, 23158, 45605 <sup>*</sup> , 45606 <sup>*</sup> ,<br>45607 <sup>*</sup> , 45608 <sup>*</sup> , 45609 <sup>*</sup> ; MZUSP: 3588, 3589,<br>3591, 3593, 3594, 3595, 3596, 4313, 4829, 4833,<br>4840, 4865, 4899, 4900, 4901, 4902, 4903, 4904,<br>4905, 4906, 4907, 4908, 4909, 4910, 4911, 4913,<br>4914, 4915, 4916, 4918, 4940, 4959, 4964, 4965,<br>4966, 4967, 4968, 4969, 4970, 4971, 4972, 4973,<br>4974, 4975, 5007, 5026, 6633, 11272, 11307,<br>11308, 11367, 11407, 11307, 11308. |
| <i>Mico chrysoleucos</i><br>(n=60) | FMNH: 50821, 50822, 50823, 50825, 50826,<br>50827, 50828, 50829, 50830, 50831, 50832, 50833,<br>50834; INPA: 4110, 4038, 4039, 7388 <sup>*</sup> , 7389 <sup>*</sup> ,<br>7390 <sup>*</sup> ; MPEG: 237, 544, 23064, 45576 <sup>*</sup> , 45577 <sup>*</sup> ,<br>45587 <sup>*</sup> , 45590 <sup>*</sup> , 45591 <sup>*</sup> , 45610 <sup>*</sup> ; MZUSP: 4210,<br>4211, 4884, 4885, 4886, 4887, 4888, 4890, 4892,<br>4893, 4894, 4976, 5006, 5008, 5009, 5018, 5019,<br>5020, 5022, 5028, 5029, 5030, 11246, 11409,                                                                                                                                                                                                                                                                                                                                                                                                                                                                                                                                                                                                                                  |

|                                    |                                                                                                                                                                                                                                                                                                                                                                                                                                                                                                                                                                                                                                                                                                                                                                                                                                                                                          |
|------------------------------------|------------------------------------------------------------------------------------------------------------------------------------------------------------------------------------------------------------------------------------------------------------------------------------------------------------------------------------------------------------------------------------------------------------------------------------------------------------------------------------------------------------------------------------------------------------------------------------------------------------------------------------------------------------------------------------------------------------------------------------------------------------------------------------------------------------------------------------------------------------------------------------------|
|                                    | 11410, 11411, 13466, 13467; NMW: <b>ST 970, B 3455, B 3456, B 3457.</b>                                                                                                                                                                                                                                                                                                                                                                                                                                                                                                                                                                                                                                                                                                                                                                                                                  |
| <i>Mico emiliae</i><br>(n=10)      | INPA: 7287*, 7288*, 7289*, 7290*; MPEG: <b>170</b> , 37807, 37808, 37809, 45566*; MZUSP: 35106.                                                                                                                                                                                                                                                                                                                                                                                                                                                                                                                                                                                                                                                                                                                                                                                          |
| <i>Mico humeralifer</i><br>(n=124) | FMNH: 19508, 92165, 92166, 92167, 92168, 92169, 92170, 92171, 92172, 92173; INPA: 4111, 4083, 7385*, 7386*, 7282*; MPEG: 30, 172, 173, 174, 175, 178, 265, 266, 267, 268, 337, 1384, 9213, 21397, 21398, 21399, 21400, 21401, 21402, 21403, 21404, 21405, 21406, 21407, 21408, 21409, 21410, 21411, 21412, 38387, 38504, 38505, 39474, 39475, 40984, 44282, 44283, 5904*, 5905*; MZUSP: 3577, 3578, 3579, 3580, 3582, 3584, 3585, 3586, 4927, 10095, 10096, 10097, 10098, 10099, 11249, 11250, 11251, 11252, 11253, 11254, 11255, 11256, 11257, 11258, 11259, 11260, 11261, 11262, 11263, 11264, 11265, 11266, 11268, 11269, 11270, 11271, 11294, 11297, 11298, 11299, 11300, 11301, 11302, 11303, 11304, 11306, 11309, 11310, 11312, 11332, 11333, 11347, 11348, 11349, 11350, 11351, 11356, 11357, 11358, 11360, 11393, 11396, 11397, 11398, 11399, 11400, 11401, 11412, 11413, 18866. |
| <i>Mico intermedius</i><br>(n=9)   | MPEG: <b>8156, 12599</b> , 23065, 45585*, 45592*, 45594*, 45595*, 45598*, 45600*.                                                                                                                                                                                                                                                                                                                                                                                                                                                                                                                                                                                                                                                                                                                                                                                                        |
| <i>Mico leucippe</i><br>(n=29)     | FMNH: 92174, 92175, 92176; MPEG: 43661, 45563*, 45564*, 45565*, 45567*, 45568*, 45569*; MZUSP: 3598, 9964, 9965, 10093, 10094, 11248, 11279, 11280, 11281, 11291, 11295, 11296, 11305, 11311, 11361, 11394, 11402, 11403. NHM: <b>9.3.9.2</b>                                                                                                                                                                                                                                                                                                                                                                                                                                                                                                                                                                                                                                            |
| <i>Mico manicorensis</i><br>(n=1)  | INPA: <b>2511.</b>                                                                                                                                                                                                                                                                                                                                                                                                                                                                                                                                                                                                                                                                                                                                                                                                                                                                       |

|                                       |                                                                                                                                                                                                                                                                                                                                                                                                                                |
|---------------------------------------|--------------------------------------------------------------------------------------------------------------------------------------------------------------------------------------------------------------------------------------------------------------------------------------------------------------------------------------------------------------------------------------------------------------------------------|
| <i>Mico marcai</i><br>(n=2)           | MPEG: 42807, 45641.                                                                                                                                                                                                                                                                                                                                                                                                            |
| <i>Mico mauesi</i><br>(n=11)          | INPA: 4105, 4106, 4107, 4108, 4109, 4082;<br>MPEG: <b>22177</b> , 23962, 23963, 23964; MZUSP:<br>29027.                                                                                                                                                                                                                                                                                                                        |
| <i>Mico melanurus</i><br>(n=36)       | FMNH: 26730, 44859, 51888; INPA: 7296*, 7283*,<br>7383*; MPEG: 15266, 15267, 21395, 21396,<br>45571*; MZUSP: 3367, 3368, 3369, 3370, 3376,<br>4263, 4264, 4265, 4266, 6327, 6328, 6329, 6330,<br>6332, 6333, 24734; NMW: ST 1578, B 3447, B<br>3448, B 3449, B 3451, B 3758; UNIR: 192, 346,<br>356.                                                                                                                           |
| <i>Mico munduruku</i> sp. n.<br>(n=6) | INPA: <b>7284*</b> , <b>7285*</b> , <b>7382*</b> ; MPEG: <b>45559*</b> ,<br><b>45560*</b> , <b>45622</b> .                                                                                                                                                                                                                                                                                                                     |
| <i>Mico nigriceps</i><br>(n=17)       | MPEG: <b>21996</b> , <b>21997</b> , <b>21998</b> , <b>21999</b> , 22955,<br>22956, 22957, 22958, 22959, 22960, 22961, 22962,<br>45614*, 45615*, 45616*, 45617*, 45618*.                                                                                                                                                                                                                                                        |
| <i>Mico rondoni</i><br>(n=45)         | MPEG: 21365, <b>21366</b> , <b>21367</b> , <b>21646</b> , <b>21647</b> ,<br>21648, 21649, 21650, 21651, 21652, 21653, 21654,<br>21655, 21656, 21657, 21658, <b>21659</b> , <b>21660</b> , 21885,<br><b>21886</b> , 21887, 21888, 21889, 21891, 21892, <b>21893</b> ,<br><b>21894</b> , 21895, <b>21896</b> , <b>21897</b> , 21898, 28691,<br>45620*; MZUSP: 20142; UNIR: 15, 26, 48, 78,<br>159, 162, 165, 396, 556, 639, 158. |
| <i>Mico saterei</i><br>(n=14)         | INPA: 4040, 4101, 4102, 4103, 4104, 4082, 5672;<br>MPEG: <b>23955</b> , <b>23956</b> , <b>23957</b> , <b>23958</b> , <b>23959</b> ,<br><b>23960</b> , <b>23961</b> .                                                                                                                                                                                                                                                           |
