# Supplementary material for: The Munduruku marmoset: a new monkey species from southern Amazonia
Source: PeerJ journal article supplement (doi:10.7717/peerj.7019), 2019-07-25
Supplement: Supplemental_Table_S3.pdf [file Supplemental_Table_S3.pdf]

| Taxon                            | Specimen code                                    |
|----------------------------------|--------------------------------------------------|
| <i>Callibella humilis</i>        | <b>INPA</b> 4090.                                |
| <i>Cebuella cf. niveiventris</i> | <b>CTGA-M</b> 170.                               |
| <i>Mico argentatus</i>           | <b>CTGA-M</b> 434, 6015, 6016.                   |
| <i>Mico emiliae</i>              | <b>INPA</b> 7287*, 7289*; <b>MPEG</b> 45566*.    |
| <i>Mico humeralifer</i>          | <b>INPA</b> 7282*.                               |
| <i>Mico intermedius</i>          | <b>IDSM</b> 792; <b>UFMT</b> 4705.               |
| <i>Mico leucippe</i>             | <b>MPEG</b> 45568*, 45569*; <b>CTGA-M</b> 5912*. |
| <i>Mico marcai</i>               | <b>MPEG</b> 45641.                               |
| <i>Mico mauesi</i>               | <b>CTGA-M</b> 5881*.                             |
| <i>Mico melanurus</i>            | <b>INPA</b> 7383*.                               |
| <i>Mico munduruku</i> sp. n.     | <b>INPA</b> 7284*, 7382*; <b>MPEG</b> 45559*.    |
| <i>Mico rondoni</i>              | <b>UNIR</b> 556.                                 |
| <i>Mico saterei</i>              | <b>INPA</b> 4104.                                |
